# Supplementary material for: Associations Between Metal Levels in Whole Blood and IgE Concentrations in Pregnant Women Based on Data From the Japan Environment and Children’s Study
Source: PubMed Central journal article supplement (PMC6859078; doi:10.2188/jea.je20180098), 2019-12-05
Supplement: je-29-478-s001.pdf [file je-29-478-s001.pdf]

**eTable 1.** Results of the multivariable analysis for the relationship between the quartile concentration of metals and total and allergen-specific IgEs

| Quartile concentration of metals, ng/g | Total IgE, IU/mL      |                       |                          |                      | Egg white-specific IgE, UA/mL |                     |                          |                      | Moth-specific IgE, UA/mL |                       |                          |                      |
|----------------------------------------|-----------------------|-----------------------|--------------------------|----------------------|-------------------------------|---------------------|--------------------------|----------------------|--------------------------|-----------------------|--------------------------|----------------------|
|                                        | Low (<0.35; n=11,133) | High (≥0.35; n=3,275) | OR (95% CI) <sup>a</sup> | P value <sup>a</sup> | Low (<0.35; n=14,260)         | High (≥0.35; n=148) | OR (95% CI) <sup>a</sup> | P value <sup>a</sup> | Low (<0.35; n=10,331)    | High (≥0.35; n=4,077) | OR (95% CI) <sup>a</sup> | P value <sup>a</sup> |
| <b>Cd</b>                              |                       |                       |                          |                      |                               |                     |                          |                      |                          |                       |                          |                      |
| Q1 (≤0.495)                            | 2,752                 | 843                   | 1.00 (referent)          |                      | 3,547                         | 48                  | 1.00 (referent)          |                      | 2,598                    | 997                   | 1.00 (referent)          |                      |
| Q2 (0.496–0.657)                       | 2,748                 | 850                   | 1.04 (0.93–1.16)         | 0.516                | 3,562                         | 36                  | 0.79 (0.51–1.23)         | 0.298                | 2,582                    | 1,016                 | 1.06 (0.95–1.17)         | 0.297                |
| Q3 (0.658–0.897)                       | 2,800                 | 804                   | 0.99 (0.88–1.11)         | 0.872                | 3,568                         | 36                  | 0.83 (0.53–1.30)         | 0.424                | 2,564                    | 1,040                 | 1.12 (1.00–1.24)         | 0.042                |
| Q4 (≥0.898)                            | 2,833                 | 778                   | 0.96 (0.85–1.08)         | 0.519                | 3,583                         | 28                  | 0.71 (0.43–1.15)         | 0.163                | 2,587                    | 1,024                 | 1.09 (0.98–1.22)         | 0.113                |
| <b>Pb</b>                              |                       |                       |                          |                      |                               |                     |                          |                      |                          |                       |                          |                      |
| Q1 (≤4.78)                             | 2,802                 | 798                   | 1.00 (referent)          |                      | 3,559                         | 41                  | 1.00 (referent)          |                      | 2,612                    | 988                   | 1.00 (referent)          |                      |
| Q2 (4.79–5.92)                         | 2,800                 | 791                   | 0.98 (0.87–1.10)         | 0.704                | 3,548                         | 43                  | 1.05 (0.68–1.62)         | 0.822                | 2,604                    | 987                   | 0.98 (0.88–1.09)         | 0.730                |
| Q3 (5.93–                              | 2,772                 | 835                   | 1.05                     | 0.362                | 3,577                         | 30                  | 0.73                     | 0.206                | 2,546                    | 1,061                 | 1.07                     | 0.182                |

|                    |       |     |                     |       |       |    |                     |       |       |       |                     |       |
|--------------------|-------|-----|---------------------|-------|-------|----|---------------------|-------|-------|-------|---------------------|-------|
| 7.42)              |       |     | (0.94–1.18)         |       |       |    | (0.46–1.18)         |       |       |       | (0.97–1.19)         |       |
| Q4 ( $\geq 7.43$ ) | 2,759 | 851 | 1.08<br>(0.96–1.21) | 0.213 | 3,576 | 34 | 0.85<br>(0.53–1.36) | 0.498 | 2,569 | 1,041 | 1.02<br>(0.92–1.13) | 0.691 |
| <b>Hg</b>          |       |     |                     |       |       |    |                     |       |       |       |                     |       |
| Q1 ( $\leq 2.55$ ) | 2,749 | 835 | 1.00<br>(referent)  |       | 3,542 | 42 | 1.00<br>(referent)  |       | 2,527 | 1,057 | 1.00<br>(referent)  |       |
| Q2 (2.56–<br>3.61) | 2,783 | 823 | 0.96<br>(0.85–1.07) | 0.433 | 3,575 | 31 | 0.71<br>(0.45–1.14) | 0.160 | 2,595 | 1,011 | 0.93<br>(0.84–1.03) | 0.159 |
| Q3 (3.62–<br>5.11) | 2,790 | 793 | 0.92<br>(0.82–1.03) | 0.167 | 3,552 | 31 | 0.72<br>(0.45–1.16) | 0.175 | 2,596 | 987   | 0.91<br>(0.82–1.01) | 0.067 |
| Q4 ( $\geq 5.12$ ) | 2,811 | 824 | 0.92<br>(0.82–1.04) | 0.171 | 3,591 | 44 | 0.98<br>(0.63–1.50) | 0.908 | 2,613 | 1,022 | 0.93<br>(0.84–1.03) | 0.183 |
| <b>Se</b>          |       |     |                     |       |       |    |                     |       |       |       |                     |       |
| Q1 ( $\leq 156$ )  | 2,657 | 757 | 1.00<br>(referent)  |       | 3,383 | 31 | 1.00<br>(referent)  |       | 2,439 | 975   | 1.00<br>(referent)  |       |
| Q2 (157–168)       | 2,758 | 839 | 1.10<br>(0.98–1.23) | 0.114 | 3,556 | 41 | 1.29<br>(0.80–2.06) | 0.295 | 2,547 | 1,050 | 1.03<br>(0.93–1.15) | 0.556 |
| Q3 (169–181)       | 2,825 | 786 | 0.99<br>(0.88–1.11) | 0.817 | 3,577 | 34 | 1.05<br>(0.64–1.72) | 0.844 | 2,621 | 990   | 0.94<br>(0.85–1.05) | 0.256 |
| Q4 ( $\geq 182$ )  | 2,893 | 893 | 1.12<br>(1.00–1.26) | 0.046 | 3,744 | 42 | 1.28<br>(0.80–2.05) | 0.308 | 2,724 | 1,062 | 0.97<br>(0.87–1.07) | 0.534 |
| <b>Mn</b>          |       |     |                     |       |       |    |                     |       |       |       |                     |       |
| Q1 ( $\leq 12.4$ ) | 2,702 | 782 | 1.00                |       | 3,451 | 33 | 1.00                |       | 2,473 | 1,911 | 1.00                |       |

|                |       |     |                     |       |       |    |                     |       |       |       |                     |       |
|----------------|-------|-----|---------------------|-------|-------|----|---------------------|-------|-------|-------|---------------------|-------|
|                |       |     | (referent)          |       |       |    | (referent)          |       |       |       | (referent)          |       |
| Q2 (12.5–15.1) | 2,791 | 837 | 1.04<br>(0.93–1.17) | 0.484 | 3,597 | 31 | 0.90<br>(0.55–1.47) | 0.673 | 2,597 | 1,031 | 0.97<br>(0.88–1.08) | 0.610 |
| Q3 (15.2–18.4) | 2,821 | 840 | 1.02<br>(0.91–1.14) | 0.736 | 3,620 | 41 | 1.16<br>(0.73–1.84) | 0.542 | 2,643 | 1,018 | 0.94<br>(0.85–1.04) | 0.227 |
| Q4 (≥18.5)     | 2,819 | 816 | 1.00<br>(0.89–1.12) | 0.992 | 3,592 | 43 | 1.23<br>(0.77–1.95) | 0.382 | 2,618 | 1,017 | 0.96<br>(0.86–1.06) | 0.396 |

<sup>a</sup>Odds ratios and corresponding 95% confidence intervals and P values were obtained using multivariable logistic regression analysis adjusted for age, BMI, allergic diseases (asthma, allergic rhinitis, atopic dermatitis, allergic conjunctivitis, food allergy, drug allergy), smoking during pregnancy, smoking habits of partner, alcohol consumption during pregnancy, owning pets, month of T1 blood sampling, and geographic region.
